# Supplementary material
Source: Elsevier journal article supplement (https://comptes-rendus.academie-sciences.fr/biologies/article/10.1016/j.crvi.2011.02.003/file/attach/mmc2.pdf)
Supplement: mmc2 [file mmc2.pdf]

## Microsatellite and minisatellite markers based DNA fingerprinting and genetic diversity of blast and ufra resistant genotypes

M. Abdul Latif<sup>a</sup>, M. Yusop Rafii<sup>a</sup>, M. Moshiur Rahman<sup>b</sup>, M.R. Badiuzzaman Talukdar<sup>b</sup>

### Appendix 2. Binary outputs of SSR and VNTR markers over 12 ufra resistant and susceptible genotypes

| Marker | Aokazi | Bajail | BR11 | BR3 | Fukuhonami | Hunenwase | Kinonishiki | Koshinishini | Matsuhonami | Rayda | Reihou | Shinanokogane |
|--------|--------|--------|------|-----|------------|-----------|-------------|--------------|-------------|-------|--------|---------------|
| GF1    | 1      | 0      | 0    | 0   | 0          | 1         | 1           | 0            | 0           | 1     | 1      | 0             |
| GF2    | 1      | 1      | 0    | 0   | 1          | 1         | 0           | 1            | 0           | 1     | 0      | 0             |
| GF3    | 1      | 1      | 1    | 0   | 1          | 1         | 0           | 1            | 1           | 1     | 0      | 0             |
| MR1    | 0      | 1      | 0    | 0   | 1          | 1         | 1           | 0            | 1           | 0     | 0      | 0             |
| MR2    | 0      | 1      | 1    | 1   | 1          | 0         | 1           | 1            | 0           | 1     | 0      | 1             |
| MR3    | 0      | 1      | 1    | 1   | 1          | 0         | 1           | 1            | 1           | 1     | 0      | 0             |
| MR4    | 0      | 1      | 1    | 1   | 1          | 1         | 0           | 0            | 1           | 0     | 1      | 0             |
| MR5    | 0      | 1      | 0    | 0   | 1          | 1         | 0           | 1            | 0           | 1     | 1      | 1             |
| MR6    | 0      | 1      | 0    | 0   | 0          | 0         | 1           | 0            | 0           | 1     | 0      | 1             |
| MR7    | 0      | 0      | 1    | 1   | 1          | 0         | 1           | 0            | 1           | 0     | 1      | 1             |
| RM11   | 0      | 0      | 1    | 0   | 0          | 0         | 0           | 0            | 1           | 0     | 0      | 0             |
| RM11   | 1      | 0      | 0    | 0   | 0          | 0         | 0           | 0            | 0           | 0     | 1      | 0             |
| RM11   | 0      | 0      | 0    | 1   | 0          | 0         | 0           | 1            | 0           | 1     | 0      | 0             |
| RM11   | 0      | 1      | 0    | 0   | 0          | 0         | 1           | 0            | 0           | 0     | 0      | 1             |
| RM11   | 0      | 0      | 0    | 0   | 0          | 1         | 0           | 0            | 0           | 0     | 0      | 0             |
| RM11   | 0      | 0      | 0    | 0   | 1          | 0         | 0           | 0            | 0           | 0     | 0      | 0             |
| RM17   | 0      | 0      | 0    | 1   | 0          | 0         | 0           | 0            | 0           | 0     | 0      | 0             |
| RM17   | 1      | 0      | 0    | 0   | 0          | 0         | 0           | 0            | 1           | 0     | 0      | 0             |
| RM17   | 0      | 0      | 1    | 0   | 0          | 1         | 1           | 1            | 0           | 1     | 0      | 0             |
| RM17   | 0      | 0      | 0    | 0   | 0          | 0         | 0           | 0            | 0           | 0     | 1      | 1             |
| RM17   | 0      | 1      | 0    | 0   | 1          | 0         | 0           | 0            | 0           | 0     | 0      | 0             |
| RM108  | 0      | 0      | 1    | 0   | 0          | 0         | 0           | 0            | 0           | 0     | 0      | 0             |
| RM108  | 0      | 0      | 0    | 0   | 1          | 0         | 0           | 0            | 0           | 0     | 0      | 0             |
| RM108  | 1      | 0      | 0    | 1   | 0          | 1         | 0           | 1            | 1           | 0     | 0      | 0             |
| RM108  | 0      | 0      | 0    | 0   | 0          | 0         | 0           | 0            | 0           | 0     | 1      | 0             |
| RM108  | 0      | 1      | 0    | 0   | 0          | 0         | 0           | 0            | 0           | 1     | 0      | 0             |
| RM108  | 0      | 0      | 0    | 0   | 0          | 0         | 1           | 0            | 0           | 0     | 0      | 1             |
| RM21   | 0      | 1      | 0    | 0   | 0          | 0         | 0           | 0            | 1           | 0     | 0      | 0             |

| Marker | Aokazi | Bajail | BR11 | BR3 | Fukuhonami | Hunenwase | Kinonishiki | Koshinishini | Matsuhonami | Rayda | Reihou | Shinanokogane |
|--------|--------|--------|------|-----|------------|-----------|-------------|--------------|-------------|-------|--------|---------------|
| RM21   | 0      | 0      | 1    | 0   | 0          | 0         | 0           | 0            | 0           | 0     | 0      | 0             |
| RM21   | 0      | 0      | 0    | 1   | 0          | 0         | 0           | 0            | 0           | 0     | 0      | 0             |
| RM21   | 0      | 0      | 0    | 0   | 0          | 1         | 1           | 1            | 0           | 0     | 1      | 1             |
| RM21   | 1      | 0      | 0    | 0   | 0          | 0         | 0           | 0            | 0           | 1     | 0      | 0             |
| RM21   | 0      | 0      | 0    | 0   | 1          | 0         | 0           | 0            | 0           | 0     | 0      | 0             |
| RM222  | 0      | 0      | 0    | 0   | 0          | 0         | 0           | 1            | 0           | 0     | 0      | 0             |
| RM222  | 0      | 0      | 1    | 0   | 0          | 0         | 0           | 0            | 0           | 0     | 0      | 0             |
| RM222  | 0      | 0      | 0    | 0   | 0          | 0         | 0           | 0            | 1           | 0     | 1      | 0             |
| RM222  | 0      | 0      | 0    | 0   | 1          | 0         | 0           | 0            | 0           | 0     | 0      | 0             |
| RM222  | 1      | 0      | 0    | 0   | 0          | 1         | 0           | 0            | 0           | 0     | 0      | 1             |
| RM222  | 0      | 1      | 0    | 1   | 0          | 0         | 1           | 0            | 0           | 0     | 0      | 0             |
| RM222  | 0      | 0      | 0    | 0   | 0          | 0         | 0           | 0            | 0           | 1     | 0      | 0             |
| RM23   | 0      | 0      | 0    | 0   | 0          | 0         | 0           | 0            | 0           | 1     | 0      | 0             |
| RM23   | 0      | 0      | 1    | 0   | 0          | 0         | 0           | 0            | 0           | 0     | 0      | 0             |
| RM23   | 1      | 0      | 0    | 0   | 0          | 0         | 1           | 1            | 0           | 0     | 0      | 0             |
| RM23   | 0      | 0      | 0    | 1   | 0          | 0         | 0           | 0            | 0           | 0     | 0      | 0             |
| RM23   | 0      | 0      | 0    | 0   | 0          | 0         | 0           | 0            | 0           | 0     | 1      | 0             |
| RM23   | 0      | 0      | 0    | 0   | 0          | 0         | 1           | 0            | 1           | 0     | 0      | 0             |
| RM23   | 0      | 1      | 0    | 0   | 1          | 0         | 0           | 0            | 0           | 0     | 0      | 0             |
| RM80   | 0      | 0      | 0    | 0   | 0          | 0         | 0           | 0            | 0           | 1     | 0      | 0             |
| RM80   | 0      | 0      | 0    | 0   | 0          | 0         | 0           | 1            | 0           | 1     | 0      | 0             |
| RM80   | 1      | 0      | 0    | 0   | 1          | 0         | 0           | 0            | 1           | 0     | 0      | 0             |
| RM80   | 0      | 1      | 0    | 0   | 0          | 0         | 0           | 0            | 0           | 0     | 0      | 0             |
| RM80   | 0      | 0      | 1    | 0   | 0          | 0         | 0           | 0            | 0           | 0     | 1      | 0             |
| RM80   | 0      | 0      | 0    | 0   | 0          | 1         | 0           | 0            | 0           | 0     | 0      | 1             |
| RM80   | 0      | 0      | 0    | 1   | 0          | 0         | 0           | 0            | 0           | 0     | 0      | 0             |
| RY1    | 0      | 1      | 1    | 0   | 1          | 1         | 1           | 1            | 0           | 0     | 1      | 1             |
| RY2    | 0      | 1      | 1    | 1   | 1          | 1         | 1           | 1            | 0           | 0     | 1      | 1             |
| RY3    | 0      | 1      | 1    | 1   | 1          | 0         | 1           | 1            | 1           | 1     | 0      | 0             |

1= present; 0= absent band
